# Supplementary material
Source: Royal Society of Chemistry journal article supplement (doi:10.1039/d6cy00524a)
Supplement: d6cy00524a1.pdf [file d6cy00524a1.pdf]

# **Sulfidation Mechanism and Hydrogenation Activity Regulation of Iron Oxides Sulfurized with Elemental Sulfur for Coal Liquefaction Catalysts**

*Yahui Yao*<sup>a, b, #</sup>, *Yang Bai*<sup>c, #</sup>, *Lei Tian*<sup>d</sup>, *Qiang Guo*<sup>d, \*</sup>, *Jianfeng Hu*<sup>a, b, \*</sup>

*Yong Yang*<sup>d, \*</sup>, *Hao Zhang*<sup>a, b, \*</sup>

<sup>a</sup> College of Chemistry & Chemical Engineering, Inner Mongolia University, Hohhot, 010021, China

<sup>b</sup> Inner Mongolia Key Laboratory of Synthesis and Application of Organic Functional 10 Molecules, Inner Mongolia University, Hohhot 010021, China

<sup>c</sup> Tianjin Key Laboratory of Applied Catalysis Science and Technology, School of Chemical Engineering, Tianjin University, Tianjin 300350, China

<sup>d</sup> National Energy Center for Coal to Liquids, Synfuels China Co., Ltd, Beijing, 101407, China

E-mail: guoqiang@synfuelschina.com.cn (Q. Guo), jfeng-hu@imu.edu.cn (JF. Hu),  
yyong@sxicc.ac.cn (Y. Yang), haozhang@imu.edu.cn (H. Zhang).

\* Corresponding author.

## Supplementary Material

### 1. Parameters for analyzing Mössbauer spectrum data

Table S1 Parameters for analyzing Mössbauer spectrum data

| Species                            | Formula                                  | Fe sites | IS/(mm/s) | QS/(mm/s) | H/(T) |
|------------------------------------|------------------------------------------|----------|-----------|-----------|-------|
| Hexagonal Pyrrhotite <sup>1</sup>  | Fe <sub>1-x</sub> S                      | 1        | 0.74      | 0.01      | 33.01 |
|                                    |                                          | 2        | 0.72      | 0.02      | 30.44 |
|                                    |                                          | 3        | 0.71      | 0.02      | 28.18 |
|                                    |                                          | 4        | 0.74      | 0.01      | 25.63 |
| Monoclinic Pyrrhotite <sup>2</sup> | Fe <sub>7</sub> S <sub>8</sub>           | 1        | 0.85      | -0.04     | 33.40 |
|                                    |                                          | 2        | 0.86      | 0.08      | 31.40 |
|                                    |                                          | 3        | 0.81      | -0.09     | 27.10 |
|                                    |                                          | 4a       | 0.83      | 0.08      | 24.40 |
| Greigite <sup>3</sup>              | Fe <sub>3</sub> S <sub>4</sub>           | 4b       | 0.82      | 0.17      | 20.70 |
|                                    |                                          | a        | 0.66      | -         | 32.70 |
| Troilite <sup>4</sup>              | FeS                                      | b        | 0.38      | -         | 31.90 |
|                                    |                                          | -        | 0.89      | -0.14     | 32.80 |
| Pyrite <sup>5</sup>                | FeS <sub>2</sub>                         | -        | 0.43      | 0.66      | -     |
| Maghemite <sup>6</sup>             | $\gamma$ -Fe <sub>2</sub> O <sub>3</sub> | x        | 0.47      | -0.01     | 51.00 |
|                                    |                                          | y        | 0.34      | -0.03     | 48.10 |
| Magnetite <sup>6</sup>             | Fe <sub>3</sub> O <sub>4</sub>           | A        | 0.42      | 0.06      | 51.60 |
|                                    |                                          | B        | 0.99      | 0.89      | 51.00 |
| $\alpha$ -Fe <sup>7</sup>          | Fe                                       | -        | 0.09      | 0.04      | 33.80 |

### 2. Methods of Temperature-Programmed Sulfidation in a Slurry Bed

#### 2.1 H<sub>2</sub>S Generation During Temperature-Programmed Sulfidation

Temperature-programmed sulfidation of the iron oxide precursor was conducted in a slurry-bed reactor (internal volume: 100 mL) under a continuous H<sub>2</sub> flow, using 20 g of n-tetradecane as the solvent oil. The reactor was purged with H<sub>2</sub> at a flow rate of

500 mL/min for 5 min. The pressure was then adjusted to 5 MPa using a back-pressure regulator, and the H<sub>2</sub> flow rate was set to 200 mL/min. The temperature was increased to 80 °C at 4 °C/min, followed by a further increase to 350 °C at 1 °C/min. The H<sub>2</sub>S content in the tail gas during sulfidation was analyzed online using an Agilent 7890A gas chromatograph.

## 2.2 Low-Temperature Sulfidation

Low-temperature sulfidation was performed in a slurry-bed reactor (internal volume: 100 mL) under a continuous flow of N<sub>2</sub> or H<sub>2</sub>. The reactor was charged with 2 g of  $\gamma$ -Fe<sub>2</sub>O<sub>3</sub>, 2 g of elemental sulfur ((S/Fe)<sub>atom</sub> = 2.5), and 20 g of solvent oil (n-tetradecane). It was purged with N<sub>2</sub> or H<sub>2</sub> at 500 mL/min for 5 min. The pressure was adjusted to 5 MPa, and the N<sub>2</sub> or H<sub>2</sub> flow rate was set to 200 mL/min. The temperature was increased to 80 °C at 4 °C/min, then further raised to the target temperature (150 °C, 160 °C, or 170 °C) at 1 °C/min. After reaching the target temperature, the reactor was rapidly cooled to room temperature. The solid catalyst was separated, washed with CS<sub>2</sub>, thoroughly rinsed with n-hexane, and then dried in a tubular furnace under N<sub>2</sub> flow (set at 100 °C for 1 h). The dried sample was sealed in a quartz tube and transferred to a dedicated glovebox for XPS analysis. XPS analysis was conducted on an ESCALAB 250xi spectrometer (Thermo Fisher Scientific, USA) equipped with an Al-K $\alpha$  X-ray source.

### 3. Temperature-Programmed Sulfidation in a Tubular Furnace

Approximately 50 mg of  $\gamma\text{-Fe}_2\text{O}_3$  and 50 mg of elemental sulfur (either together or separately) were placed at the central temperature-measuring point of a quartz tube (6 mm  $\times$  3 mm  $\times$  100 mm). After confirming system airtightness,  $\text{H}_2$  or  $\text{N}_2$  was introduced to purge the air inside. Following complete purging, the temperature was held at 50 °C for 1 h. Subsequently, the temperature was increased to 300 °C at a heating rate of 1 °C/min. The concentrations of  $\text{H}_2\text{S}$  and  $\text{SO}_2$  in the tail gas were monitored using a Pfeiffer Omnistar™ gas analysis mass spectrometer.

### 4. The GC results of the post-reaction solution

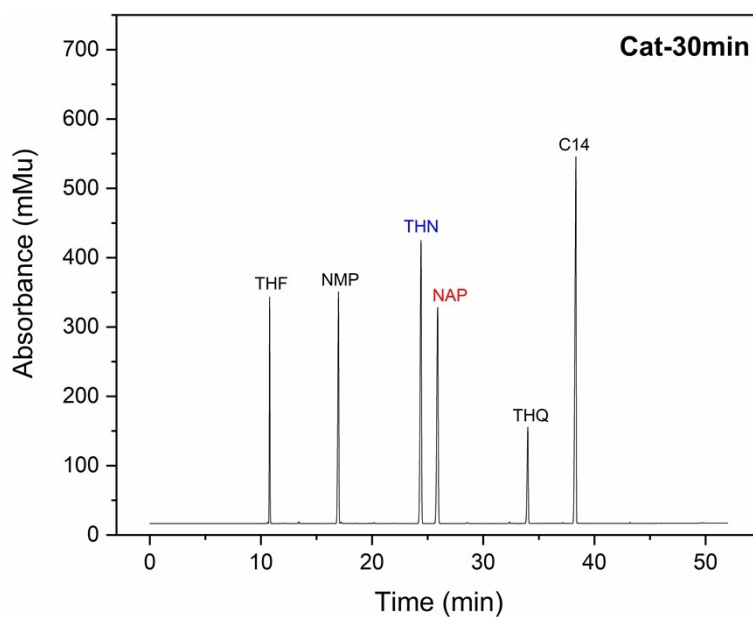

**Fig. S1** The GC results of the post-reaction solution following the application of Cat-30min.

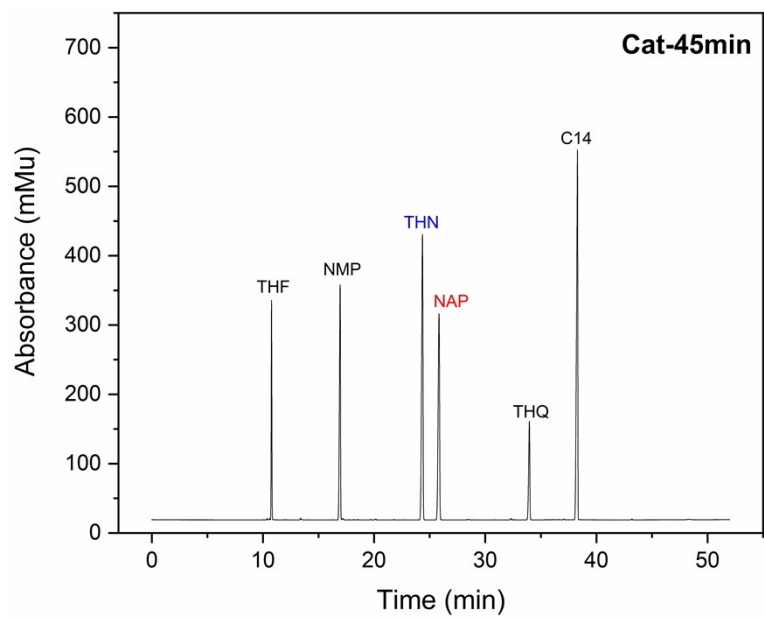

**Fig. S2** The GC results of the post-reaction solution following the application of Cat-45min.

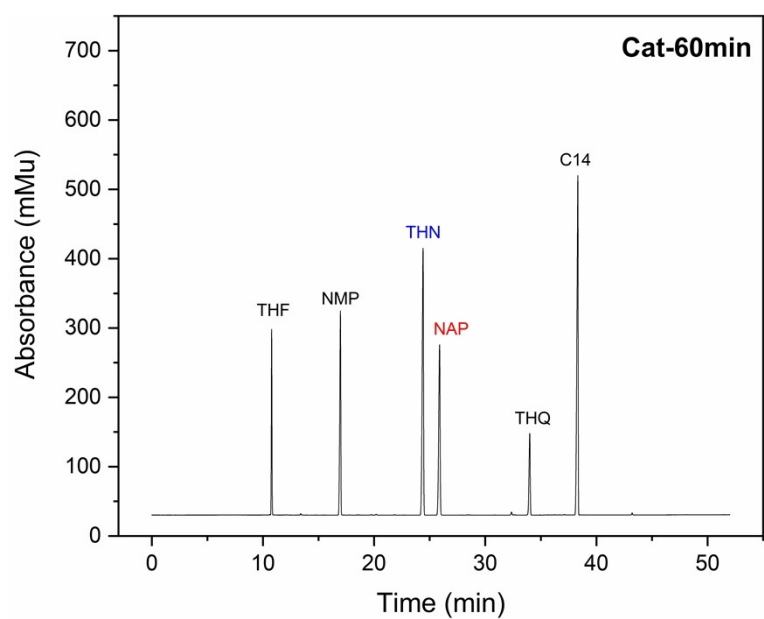

**Fig. S3** The GC results of the post-reaction solution following the application of Cat-60min.

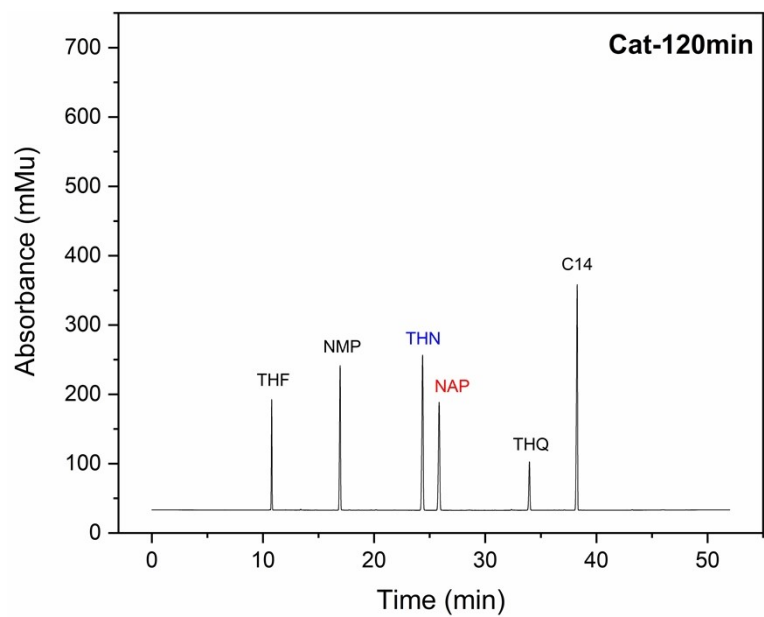

**Fig. S4** The GC results of the post-reaction solution following the application of Cat-120min.

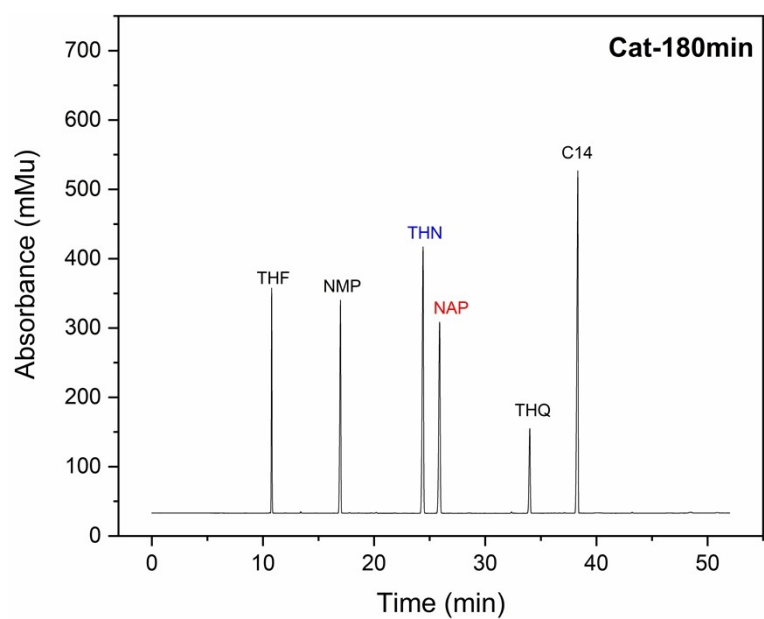

**Fig. S5** The GC results of the post-reaction solution following the application of Cat-180min.

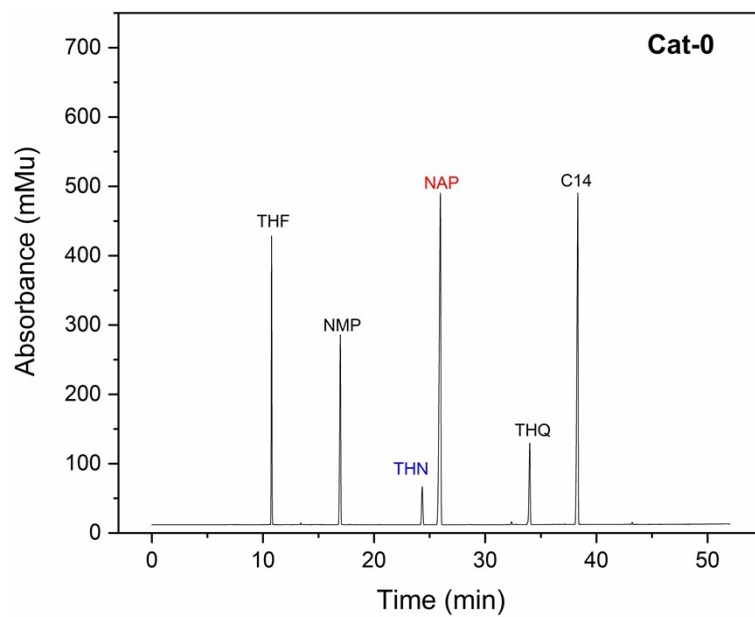

**Fig. S6** The GC results of the post-reaction solution following the application of Cat-0.

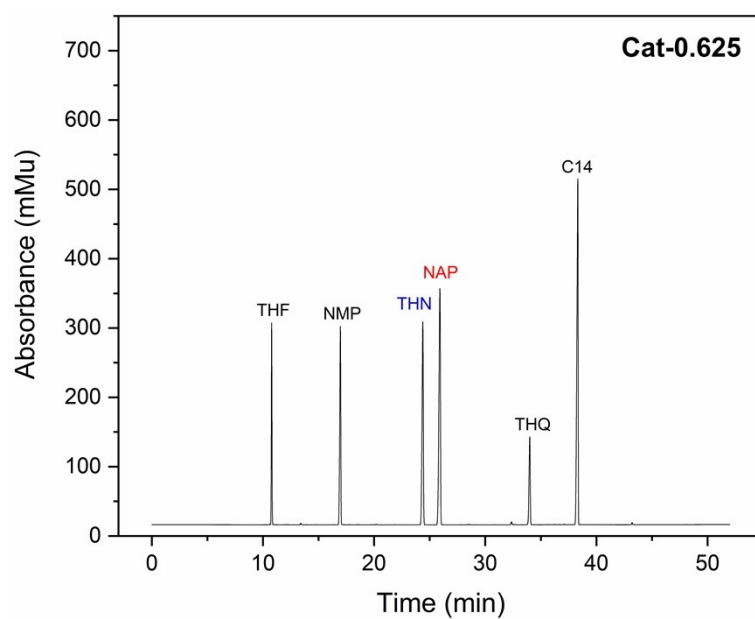

**Fig. S7** The GC results of the post-reaction solution following the application of Cat-0.625.

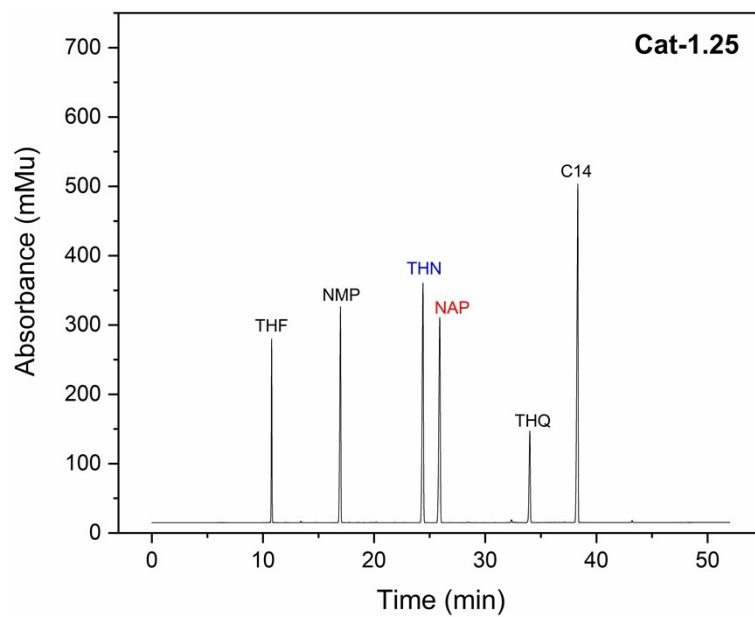

**Fig. S8** The GC results of the post-reaction solution following the application of Cat-1.25.

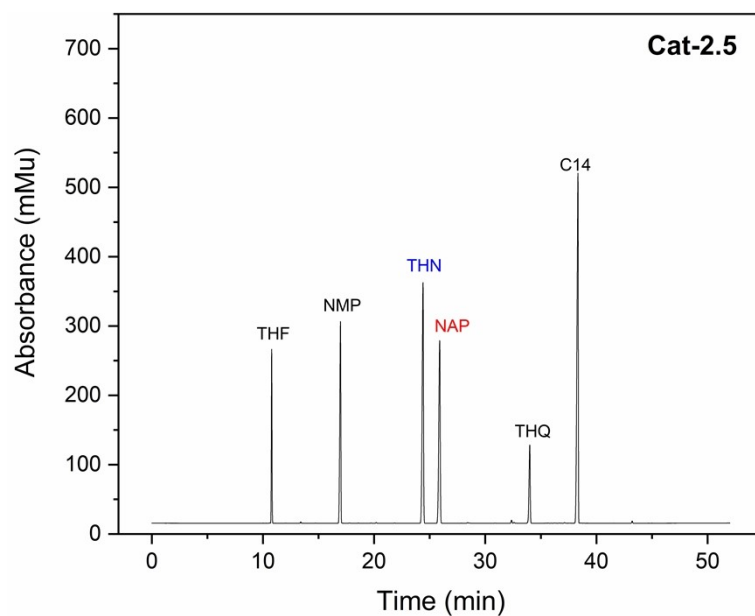

**Fig. S9** The GC results of the post-reaction solution following the application of Cat-2.5.

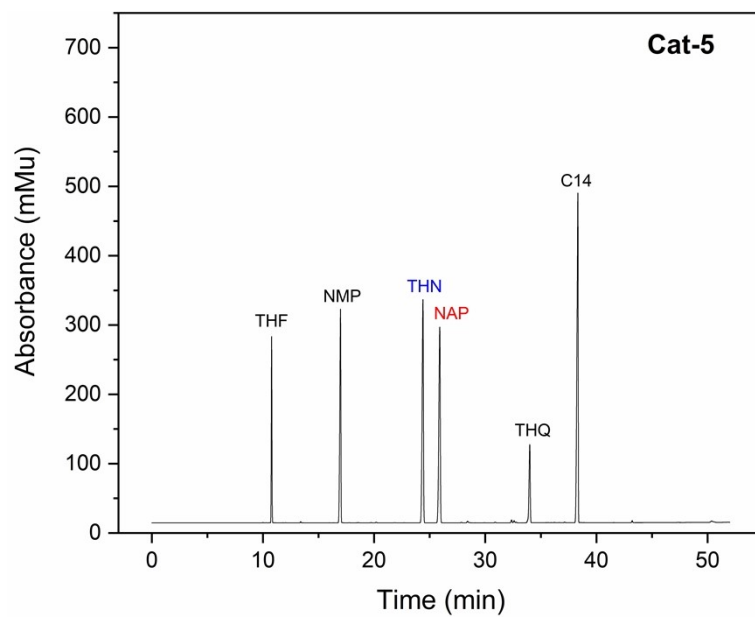

**Fig. S10** The GC results of the post-reaction solution following the application of Cat-5.

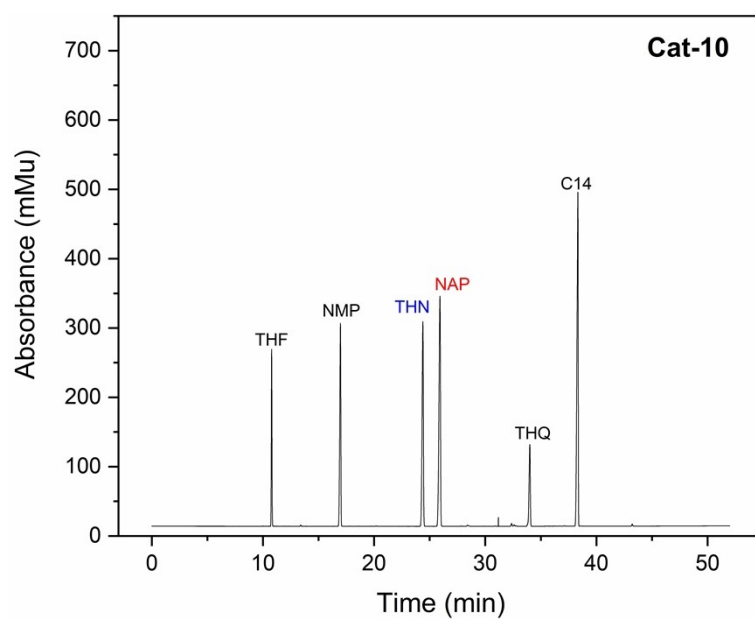

**Fig. S11** The GC results of the post-reaction solution following the application of Cat-10.

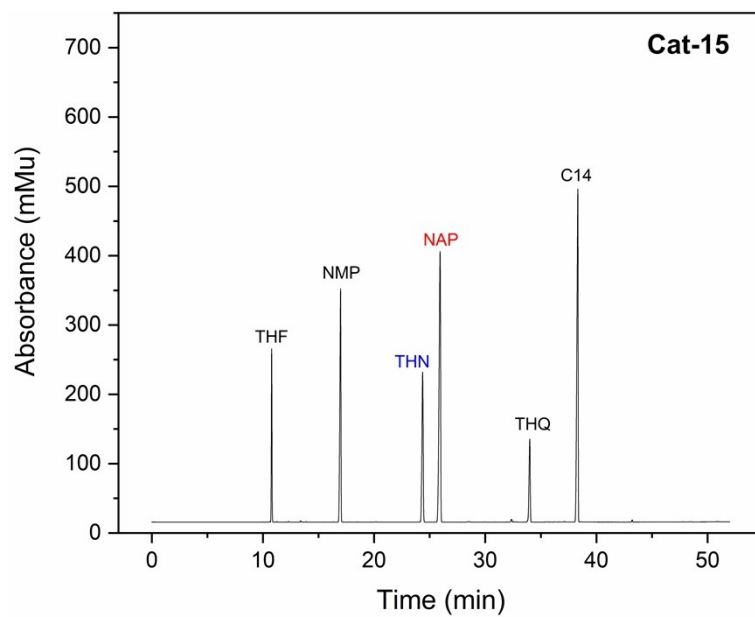

**Fig. S12** The GC results of the post-reaction solution following the application of Cat-15.

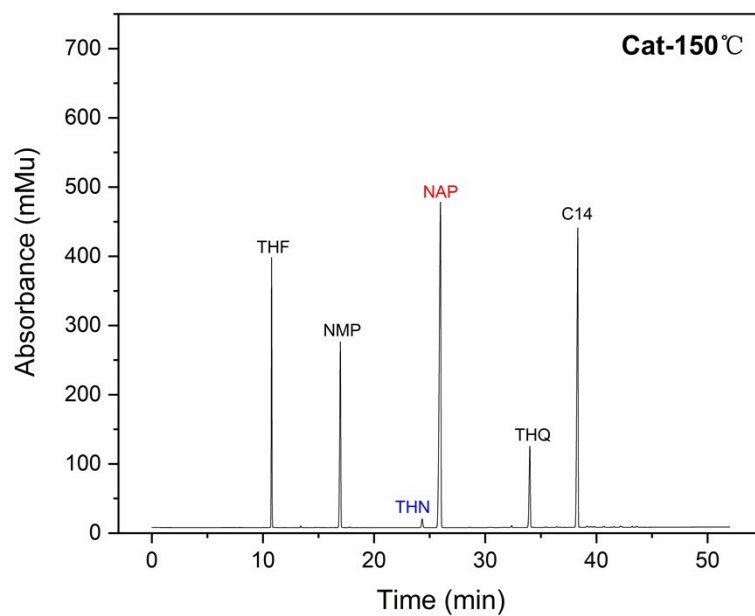

**Fig. S13** GC results of the post-reaction solution following the application of Cat-150°C.

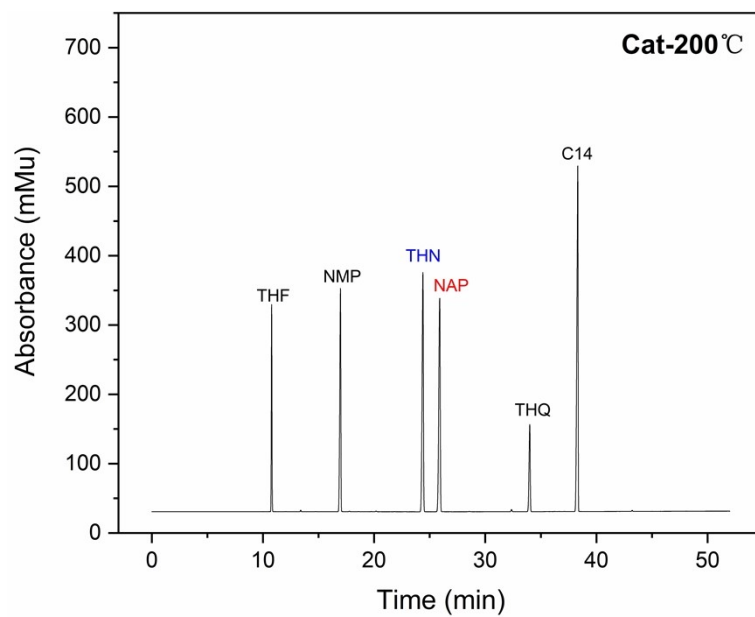

**Fig. S14** The GC results of the post-reaction solution following the application of Cat-200°C.

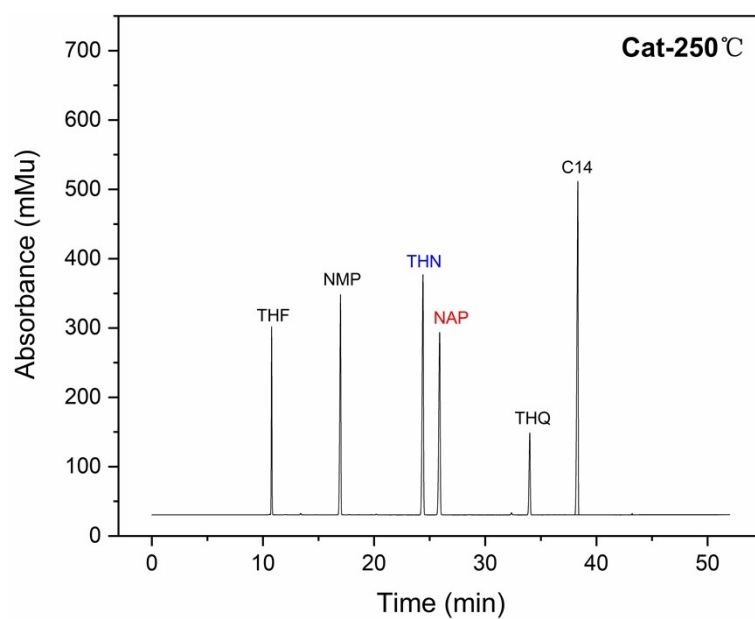

**Fig. S15** The GC results of the post-reaction solution following the application of Cat-250°C.

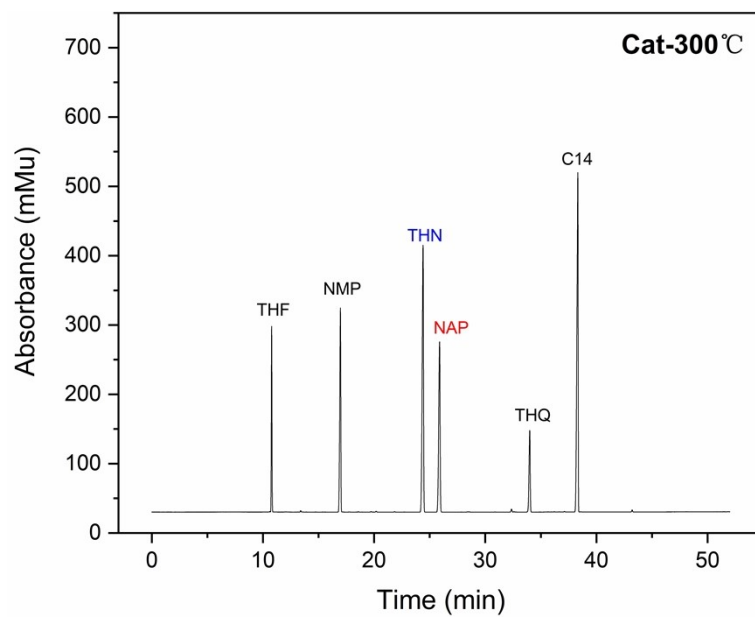

**Fig. S16** The GC results of the post-reaction solution following the application of Cat-300°C.

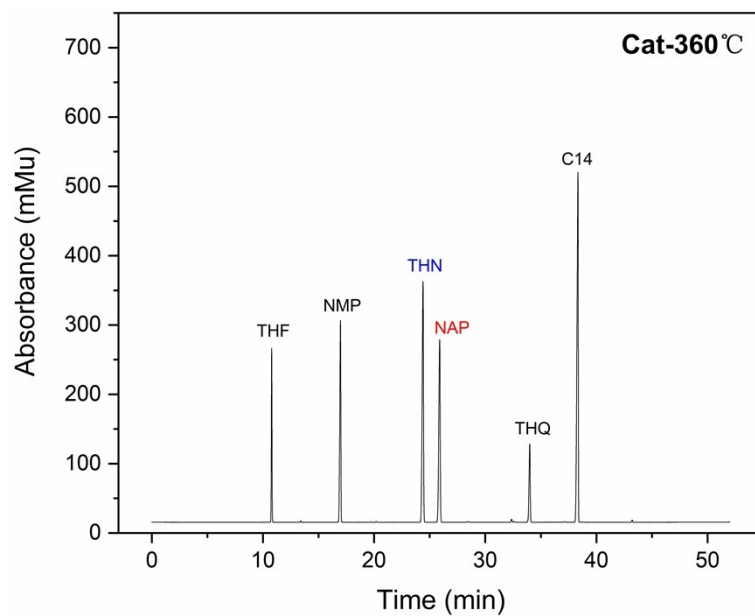

**Fig. S17** The GC results of the post-reaction solution following the application of Cat-360°C.

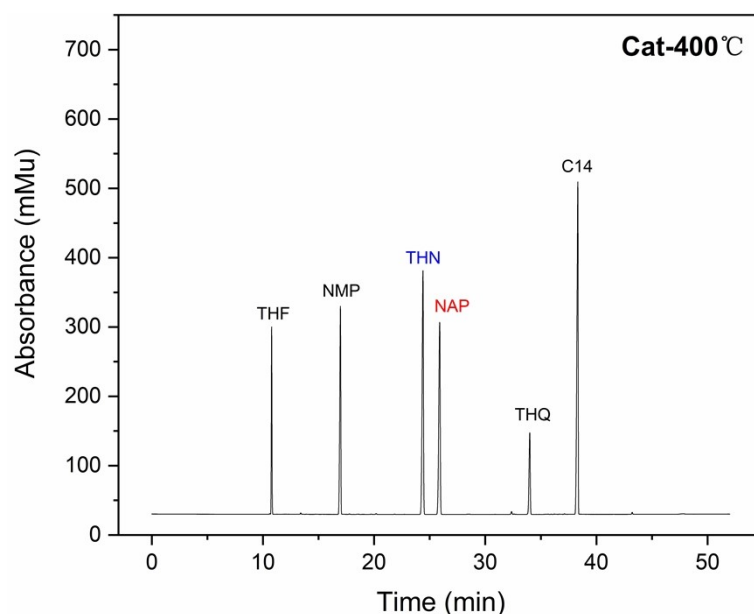

**Fig. S18** The GC results of the post-reaction solution following the application of Cat-400°C.

## References

1. Kondoro, J. W. A., Mössbauer study of vacancies in natural pyrrhotite. *Journal of Alloys and Compounds* 1999, 289 (1), 36-41.
2. Jeandey, C.; Oddou, J. L.; Mattei, J. L.; Fillion, G., Mössbauer investigation of the pyrrhotite at low temperature. *Solid State Communications* 1991, 78 (3), 195-198.
3. Chang, L.; Roberts, A. P.; Tang, Y.; Rainford, B. D.; Muxworthy, A. R.; Chen, Q., Fundamental magnetic parameters from pure synthetic greigite (Fe<sub>3</sub>S<sub>4</sub>). *Journal of Geophysical Research: Solid Earth* 2008, 113 (B6).
4. J. Cuda, T. Kohout, J. Tucek, J. Filip, O. Malina, M. Krizek, R. Zboril, In-field <sup>57</sup>Fe Mössbauer spectroscopy below spin-flop transition in powdered troilite (FeS) mineral, *AIP Conference Proceedings*, 2014, pp. 8-11.
5. P.A. Montano, M.S. Seehra, Magnetism of iron pyrite (FeS<sub>2</sub>) — a Mössbauer study in an external magnetic field, *Solid State Communications* 20(9) (1976) 897-898. [https://doi.org/10.1016/0038-1098\(76\)91300-4](https://doi.org/10.1016/0038-1098(76)91300-4).
6. S.J. Oh, D.C. Cook, H.E. Townsend, Characterization of Iron Oxides Commonly Formed as Corrosion Products on Steel Hyperfine Interactions 112(1/4) (1998) 59-66. <https://doi.org/10.1023/a:1011076308501>.

7. I. Kubono, N. Nishida, Y. Kobayashi, Y. Yamada, Mössbauer spectra of iron (III) sulfide particles, *Hyperfine Interactions* 238(1) (2017). <https://doi.org/10.1007/s10751-017-1465-z>.
